# Supplementary material for: Maternal Dietary Betaine Prevents High-Fat Diet-Induced Metabolic Disorders and Gut Microbiota Alterations in Mouse Dams and Offspring From Young to Adult
Source: Front Microbiol. 2022 Apr 5;13:809642. doi: 10.3389/fmicb.2022.809642 (PMC9037091; doi:10.3389/fmicb.2022.809642)
Supplement: Supplementary file 2 [file Table_2.XLSX]

## Sheet: Figure 1
B maternal weight
weeks	mCtr												mHF															mHFB
0	17.1	19.2	17.3	21.2	19.5	18.2	18.4	17.9	17.3	19.8	17.6	18.6	20.7	19.2	20.5	19.2	18.9	18.7	18.6	17.6	16.7	18.9	19.3	20.6	18.3	17.2	17.4	18.1	18.3	22	19.2	17.2	18.6	18.1	20.3	17.4	17.2	17.3	18.5	17.3	17.1	18.5	18.2	18.9	19.2	19.4	18.1
1	17.1	18.9	16.4	21.4	19.1	17.8	17.9	17.9	17.5	19.6	17.3	18.3	23.6	20.1	22.2	20.3	20.4	20.8	19.1	18.2	17.6	19.1	20.3	22.4	20.4	18.2	18.4	19.8	19.3	24.2	21.4	17.5	19.3	18.4	22.8	18.7	18.2	17.9	18.8	18.1	17.5	19.3	18.7	19.4	19.6	19.8	17.9
2	17.4	19.1	16.3	21.8	19	18.1	18.3	17.8	18.1	19.9	17.9	18.2	24.1	20.9	22.8	21.2	20.9	21.1	19.5	19.8	18.2	20.5	22.6	23.3	21.2	19.4	19.9	20.9	20.2	26.1	22.3	18.2	20.1	19.2	24.2	19.1	19.2	19.4	19.2	18.6	18.3	20.2	19.1	20.3	19.9	20.8	18.9
3	17.6	19.4	16.1	22.3	19.2	18.5	18.7	17.9	17.6	19.9	18.7	18.6	26.8	22.9	24.1	22.7	22.2	21.8	20.2	21.3	18.6	21.5	24.4	25.8	22.2	20.3	21.4	22.1	21.3	27.2	23.4	19.8	21.3	20.9	26.7	20.5	20.6	20.9	20.3	20.2	20.1	21.1	20.3	21.4	21.3	22.8	20.7
4	21.5	21.2	19.6	24.7	22.7	21.6							34.9	28.3	30.7	26.3	27.9	28.5	27.4	25	25.5	27	29.4	32.5	27.6	27.2	29.1	25.9	24.7	32.3	28.1	24.9	24.7	24.7	30.5	23.8	25.5	25.8	23.5	23.5	26.3	28
5	27.7	30.9	23.8	30.4	28.1								40.6	31	35.4	31.5	33.5	31	31.9	28.6	28.9	30.4	33.3	37.6	30.9	32.1	32	31.4	27	38.5	31.5	27	29.6	28.5	35.7	29	27.6	32.3	26.1	29.1	30.2	30.2
6	32.1	34.2	27.9	36.2	34.3	34.4							46.7	36.1	43.1	42.1	43.6	37.5	41.2	37.4								37.6	31.7	45.7	40.3	30.3	35.9	34.3
7	34.8	31.7	24.3	34	27.6								44.6	31.5	40	39.9	41.5	34.5										32.8	28	41	37.9	28	32.1	30.2
8	32.7	29.1	17.5	29.2	23								39.5	24.5	35.6	33.8	33.6	31.3										28.5	24.6	28.7	27.2	26.9	29.3	27.9
9	19.6	22.5	22.5	20.4	20.8								29.8	30.2	30.6	32.7	33.1	29.4										27.1	22.3	26.4	24.8	23.1	25.6	25.5
B maternal organ weight
	mCtr								mHF								mHFB
Liver	0.867033	0.5435	0.9396	1.089	0.9119	0.8681	0.8501		1.5208	1.5807	1.6047	1.6183	1.5549				1.221	1.5309	1.1712	1.3946	1.389	1.1244
BAT	0.210717	0.3418	0.1677	0.2284	0.1945	0.1498	0.1821		0.4203	0.4741	0.4809	0.7045	0.899				0.4809	0.4431	0.6971	0.5103	0.4742	0.5833
peWAT	0.202383	0.2266	0.228	0.2267	0.217	0.1578	0.1582		0.1367	0.2319	0.2092	0.2791	0.2575				0.2243	0.2257	0.3057	0.1908	0.2287	0.2689
sWAT	0.195017	0.1706	0.1397	0.2527	0.2397	0.1748	0.1926		0.8595	1.2927	1.564	1.493	1.6765				0.5039	1.2714	0.6197	1.422	0.7174	1.0371
C GTT
min	mCtr					mHF					mHFB
0	5.5	3.9	5.8	5.1	5.6	10.8	9.4	9.8	10.2	8.9		9.1	9.3	7.9	9.5
15	12.7	10.6	11.6	12.4	9.6	18.7	18.2	20	16.9	18.4		16.8	18.2	12.7	13.2
30	9.2	7.3	11.3	9.9	7.9	12.4	15.2	11.8	15.2	13.4		15.1	13.7	11.8	13.2
60	8.4	9	7.3	6.3	8	15.7	13.9	13.3	16.5	12.1		13.6	13.4	10.2	10.9
90	8.2	5.8	6.3	6.8	9	13.4	9.9	10.4	16.7	11.4		10.1	11.1	8.9	8.2
120	7.8	8	6.2	6.3	6.1	9.6	11.4	10.7	10.5	11.6		10.1	11.2	7.9	8.6
AUC	1053.75	916.5	972.75	934.5	965.25	1657.5	1570.5	1510.5	1825.5	1523.25		1522.5	1554	1206.75	1268.25
D glucose				E insulin				F HOMA-IR				G FFAs
mCtr	mHF	mHFB		mCtr	mHF	mHFB		mCtr	mHF	mHFB		mCtr	mHF	mHFB
3.69	6.96	6.57		19.7972	62.5912	53.3272		3.24674	19.3615	15.5715		486.9	729.3	470.4
3.24	7.08	7.32		51.6938	59.5952	36.2204		7.44391	18.7526	11.7837		255.6	762.3	318.9
4.26	7.56	6.15		18.3244	48.3346	68.3526		3.46942	16.2404	18.683		397.2	744.6	167.1
2.97	6.09	6.99		16.7782	43.025	35.2834		2.21472	11.6454	10.9614		503.4	236.4	284.4
5.43	8.58	7.08		40.224	75.1904	66.2254		9.70739	28.6726	20.8389		365.4	252.9	250.8
														122.1

## Sheet: Figure 2
A shannon				simpson
mCtr	mHF	mHFB		mCtr	mHF	mHFB
6.267	6.053	5.226		0.962	0.962	0.904
5.727	5.6	3.517		0.932	0.932	0.77
6.031	5.934	4.124		0.949	0.949	0.939
5.739	6.306	4.923		0.93	0.93	0.959
5.894	4.4	5.795		0.937	0.937	0.924
6.492	4.253	5.119		0.975	0.975
B pcoa
	V1	V2
mC1	0.444071	0.00891258
mC2	0.457001	-0.0482059
mC3	0.464124	-0.0275036
mC4	0.434069	-0.0110927
mC5	0.406241	-0.00717349
mC6	0.325419	0.0165888
mHF1	-0.169684	0.0662195
mHF2	-0.258304	-0.00667901
mHF3	-0.166795	0.130586
mHF4	-0.168967	0.0350013
mHF5	-0.219848	0.424923
mHF6	-0.167413	0.396164
mHFB1	-0.180904	0.0332307
mHFB2	-0.175439	-0.278988
mHFB3	-0.238184	-0.0783016
mHFB4	-0.2526	-0.352978
mHFB5	-0.273684	-0.0998682
mHFB6	-0.259105	-0.200835
C relative abundance
Taxonomy	Bacteroides	Blautia	Lactobacillus	unidentified_Lachnospiraceae	Akkermansia	Alloprevotella	Lachnoclostridium	Helicobacter	Desulfovibrio	Bilophila	Others
mCtr	0.029062	0.016341	0.007433	0.026233	0.098587	0.143126	0.004129	0.00115	0.007312	0.004124	0.662504
mHF	0.061161	0.06822	0.028087	0.060414	0.000359	0.000218	0.009859	0.01946	0.025777	0.039765	0.68668
mHFB	0.157021	0.110896	0.107209	0.085226	0.000796	0.00083	0.028528	0.00081	0.06445	0.018961	0.425274
D Intestinomos				E Acetatifactor				F Romboutsia
mCtr	mHF	mHFB		mCtr	mHF	mHFB		mCtr	mHF	mHFB
0.0143223	0.035078	0.012401		0.000640429	0.00442478	0.00148463		0.000174662	0.00375524	0.0344085
0.00992664	0.029809	0.00442478		0.000291104	0.00721938	0.00119353		2.91e-05	0.000291104	0.0121973
0.00858756	0.0328365	0.00215417		0.00101886	0.0129541	0.00078598		5.82e-05	0.00136819	0.0300128
0.0213379	0.0399103	0.00072776		0.00107708	0.00666628	0.000465766		5.82e-05	0.000116442	0.0287902
0.012139	0.0533593	0.0187762		0.00218328	0.0127795	0.00133908			0.000174662	0.0764148
0.0309443	0.0227934	0.00451211

## Sheet: Figure 3
B bodyweight
weeks	Ctr																				HFD																				HFB
0	1.15	0.070711	10	1.2	1.1	1.2	1.2	1.1	1.1	1.2	1	1.2	1.2								2.1	2.1	1.7	1.9	1.8	1.7	1.3	1.8													1	1.2	1.2	1.1	1.3	1.2	1.1	1.3	1.4
1				6.4	4.3	5.2	6.3	2.6	2.7	2.4	2.7	2.7	2.7	3.9	2.8	3.3	3.3	3.5			6.5	6.6	5.8	6.2	7	6.4	6.3	6.2													2.5	2.5	2.4	1.9	2.5	2.3	2.7	2.4	2.6
2				4.7	4.5	4.8	4.9	4.8	5.6	5.6	5.1	5.5	5.6	5.5	5.6	5.6	6				10.8	9.3	9.6	9.4	9.7	9.6	8.9														6.5	7	7.6	6.5	6.5	4.7	5.3	5.8	5.9
3				9.6	7.1	10	8.1	6.6	6.6	6.6	7	7.4	9.4	9.8	9.8	9.8	8.2	8.8			17.8	15.9	15.5	15.7	14.6	16	15.4														11.2	10.3	8.8	11.5	9.5	5.8	11.3	10.9	10.2
4				14.9	17.2	11.4	14.8	16.5	16.4	13	13.5	8.9	14.4	13.1	12.1	14.2	12.7	15.7			16	17.5	16.5	18	14.7	15.6	17.4	17.2	18.8	19.4	17.7	16.2	16.4	16.1							16.2	17.3	16.5	17	9.9	10	9.3	9.1	9.9
organ weight
	Ctr.4								HF.4								HFB.4
Liver	0.5821	0.3679	0.4171	0.3015	0.4271	0.4776	0.5707	0.5306	1.208	0.7785	0.8183	0.649					0.7377	0.5501	0.4412	0.4395	0.5021	0.5723	0.267
BAT	0.0865	0.0645	0.0604	0.0704	0.053	0.0487	0.0638	0.0654	0.1481	0.1259	0.069	0.0691					0.1032	0.0639	0.0766	0.0757	0.0639	0.096	0.0534
peWAT	0.0989	0.081	0.0734	0.0811	0.0725	0.1089	0.0865	0.0931	0.1268	0.0973	0.1047	0.0931					0.0968	0.0876	0.0822	0.0812
sWAT	0.0673	0.0553	0.0314	0.0478	0.0418	0.0473	0.0543	0.0875	0.14	0.123	0.0505	0.1162					0.0796	0.0614	0.0699	0.0756	0.0525	0.0625	0.028
C GTT
min	HFB.4						Ctr.4						HF.4
0	3.9	3.1	4.8	5.9			4	3.5	2.8	4.2	3.9	3.6	8.8	3.4	4.7	4.9	4.6	6
15	14.5	11.8	12.6	13.7			12.5	10.2	9.8	13.2	11.4	13.8	18.2	15.4	13.2	11.9	13.6	15.4
30	14.2	11.6	12.4	6.9			9.9	11.4	12.4	12.7	13.1	11.8	16.8	11.4	14.2	12.4	10.8	14.6
60	5.6	9.3	6.7	9.4			7.7	7.8	8.9	9.7	10.2	7.1	13.5	8.2	7.8	6.9	7.8	8
90	7.6	5.6	6.5	6.6			5.6	4.4	6.1	7.2	6.3	6.2	10.7	6.6	6.8	6.7	6.6	6.7
120	4.9	4.6	5.8	4.3			5.7	5.1	6.6	6.9	6.6	6.1	9.9	5.2	5.7	5.6	5.7	7
AUC	1035.75	977.25	987	949.5			924.75	878.25	996	1125.75	1089	990	1591.5	1035	1076.25	986.25	999	1150.5
D ITT
min	Ctr.4							HFB.4							HF.4
0	1	1	1	1	1	1		1	1	1	1	1	1		1	1	1	1	1	1	1
15	0.616279	0.615385	0.662338	0.442857	0.663043	0.578313		0.421053	0.578313	0.544118	0.4	0.619048	0.38806		0.614035	0.396825	1.30986	0.823529	1	0.617978	0.712644
30	0.488372	0.294872	0.467532	0.314286	0.369565	0.385542		0.192982	0.433735	0.455882	0.270588	0.404762	0.686567		0.929825	0.634921	1.23944	0.382353	0.61194	0.247191	0.37931
60	0.372093	0.179487	0.233766	0.285714	0.26087	0.204819		0.192982	0.409639	0.558824	0.129412	0.130952	0.58209		1.5614	0.84127	1	0.676471	0.552239	0.460674	0.45977
90	0.348837	0.307692	0.298701	0.285714	0.293478	0.373494		0.498246	0.457831	0.573529	0.129412	0.130952	0.641791		1.52632	1.06349	0.943662	0.75	0.641791	0.606742	0.62069
120	0.662791	0.435897	0.311688	0.485714	0.358696	0.457831		0.614035	0.542169	0.632353	0.247059	0.25	0.671642		1	0.619048	0.859155	1.19118	0.835821	0.797753	0.83908
AUC	59.3023	44.5192	48.6039	45.6429	47.7717	49.0663		48.1053	60.0904	69.375	31.0588	37.5	75.5597		145.263	94.1667	126.232	89.1176	84.6269	66.3202	71.7241
E glucose				F insulin				G HOMA-IR				H FFAs
Ctr.4	HF.4	HFB.4		Ctr.4	HF.4	HFB.4		Ctr.4	HF.4	HFB.4		Ctr.4	HF.4	HFB.4
5.19	9.48	5.4		19.284	46.6036	31.0206		4.44818	19.6357	7.44494		212.6	303	185.2
5.13	6.99	5.46		29.7543	40.224	26.3838		6.78398	12.4963	6.40247		215.4	232.3	108
3.87	5.16	4.29		27.8418	53.3272	5.8368		4.78879	12.2297	1.11288		255.3	274	289.4
3.78	6.93	5.34		35.1645	39.5757	6.9844		5.90764	12.1893	1.65763		253.5	299.9	278.8
5.01	7.2	4.29		22.3992	45.7242	33.8499		4.98756	14.6317	6.45405		178.2
[truncated: 6 more columns]

## Sheet: Figure 4
A shannon				simpson
Ctr.4	HF.4	HFB.4		Ctr.4	HF.4	HFB.4
6.46	3.265	7.028		0.962	0.603	0.983
4.477	6.765	4.784		0.763	0.981	0.8
4.81	6.451	5.513		0.805	0.973	0.919
4.196	5.987	5.964		0.748	0.951	0.96
3.693	6.779	4.869		0.652	0.982	0.805
4.849	6.814	6.054		0.806	0.981	0.933
		6.622				0.967
		6.042				0.935
B pcoa
	V1	V2
Ctr1.4	-0.00423676	0.0667649
Ctr2.4	0.259311	-0.0500306
Ctr3.4	0.205629	-0.0361798
Ctr4.4	0.271513	-0.0788158
Ctr5.4	0.302706	-0.130808
Ctr6.4	0.225868	-0.0234115
HF1.4	-0.132724	-0.174137
HF2.4	-0.21753	0.198539
HF3.4	-0.193818	0.20564
HF4.4	-0.0582276	-0.0168517
HF5.4	-0.249423	0.216789
HF6.4	-0.171754	0.21733
HFB1.4	-0.390008	-0.461721
HFB3.4	-0.254855	-0.135507
HFB4.4	-0.231251	-0.0832789
HFB5.4	0.261245	-0.0302874
HFB6.4	0.105828	0.0851261
HFB7.4	-0.0554651	0.125831
HFB8.4	0.0831568	0.101193
HFB9.4	0.244035	0.00381566
C relative abundance
Taxonomy	unidentified_Enterobacteriaceae	Akkermansia	Blautia	Bacteroides	unidentified_Lachnospiraceae	Lactobacillus	Helicobacter	Oscillibacter	Ruminiclostridium	unidentified_Clostridiales	Others
Ctr.4	0.006744	0.431954	0.00704	0.015739	0.039328	0.001994	0.000902	0.017034	0.013798	0.001077	0.464388
HF.4	0.111027	0.084532	0.01752	0.025714	0.050254	0.005051	0.002004	0.022381	0.018374	0.001339	0.661805
HFB.4	0.016276	0.200461	0.031265	0.014053	0.037185	0.01108	0.014097	0.018718	0.015057	0.005731	0.636077
D Desulfovibrio				E Romboutsia
Ctr.4	HF.4	HFB.4		Ctr.4	HF.4	HFB.4
0.010014	0.00483232	0.0013973		0.000582208	0.000349325	0.000261993
0.00430834	0.0112657	0.00713205		8.73e-05	0.000116442	0.00072776
0.00515254	0.00826735	0.00847112		0.000291104	0.000174662	0.000378435
0.00366791	0.0240452	0.00462855		2.91e-05	5.82e-05	0.000960643
0.00928621	0.0160107	0.00340591		0.000145552	0	0.000407545
0.00547275	0.0227061	0.00407545		8.73e-05	0.000378435	0.000611318
		0.00372613
		0.00296926

## Sheet: Figure 5
B bodyweight
weeks	Ctr																				HFD																				HFB
0	1.15	0.070711	10	1.2	1.1	1.2	1.2	1.1	1.1	1.2	1	1.2	1.2								2.1	2.1	1.7	1.9	1.8	1.7	1.3	1.8													1	1.2	1.2	1.1	1.3	1.2	1.1	1.3	1.4
1				6.4	4.3	5.2	6.3	2.6	2.7	2.4	2.7	2.7	2.7	3.9	2.8	3.3	3.3	3.5			6.5	6.6	5.8	6.2	7	6.4	6.3	6.2													2.5	2.5	2.4	1.9	2.5	2.3	2.7	2.4	2.6
2				4.7	4.5	4.8	4.9	4.8	5.6	5.6	5.1	5.5	5.6	5.5	5.6	5.6	6				10.8	9.3	9.6	9.4	9.7	9.6	8.9														6.5	7	7.6	6.5	6.5	4.7	5.3	5.8	5.9
3				9.6	7.1	10	8.1	6.6	6.6	6.6	7	7.4	9.4	9.8	9.8	9.8	8.2	8.8			17.8	15.9	15.5	15.7	14.6	16	15.4														11.2	10.3	8.8	11.5	9.5	5.8	11.3	10.9	10.2
4				14.9	17.2	11.4	14.8	16.5	16.4	13	13.5	8.9	14.4	13.1	12.1	14.2	12.7	15.7			16	17.5	16.5	18	14.7	15.6	17.4	17.2	18.8	19.4	17.7	16.2	16.4	16.1							16.2	17.3	16.5	17	9.9	10	9.3	9.1	9.9
5				15.5	20.5	15.6	16.6	16.8	14.9	14.2	12.7	14.4	15	13.4	12.4	11.5	13	12.6			21.1	19.5	18.5	20.3	19.6	20.4	20.1	21.4	20.8	22.6	20.8	17.5	16.8	18							15.7	14.8	14.7	15.3	16.6	8.7	24	15.2	15.3
6				19.5	19.2		20.3	17.6	19.6	20.5	15.1	21.4	16.5	16.3	16.7		16.4	19.8			20.8	20.6	21.5	23.9	22.8	22.8	19.3	21.7	21.2	20	18.4	19	17.3	19.2							18.2		16.5	16.7	15.2		8.7	15.9	19.6
7				22.8	21.1	23	19.1	21.3	21.5	20.4	20.8		18.6	18.5	18.2		17.7	21.8			22.3	20.3	24.3	24	22.4	25.1	22.8	23.4	22.1	21.9											20	16.8	17.6	16.8	22.7		16.7	23	17.9
8				23.6	22.5	21.8		22.7			22.2	21.7	20.2	19.2							23.2		25.6	24.3	23.8	25.3		23.9													22		18.3	18.5	17.5
9				23.7	23.9	22.6		23.3			23.1	22.8	20.3	20.2	20.2		19.2	23.3			24.1		26.8	25	24.1	25.8	23.8	24.7	23	23.9											23.9		18.7	24	20.1	19			19
10				25.1	25.1	23.5		24.2	25.9	25.5	24	23.9	21.4	20.5	20.8		19.5	24			25.7		28.4	25.8	25.5	26.8	24.3	25.7	24	25											22.4		19.4	19.7	19.7			18.9	27
11				26.5	25.5	24.6		25.8		25.5	24.7	25	22.1	22.7	21.3		20.9	25.5			27.1		30	26.6	27	27.2	24.7	26.5	25	25.6	25.8										23		19.8	19.8	20.5
12					25.5	24.9		25.7	26.3	25.1	23.6	24.8	22.7	22.1							26		29.6	26	26.8	25.8	23.8	25.8	25	25	25										24.3		20.2	20	20.2
13					26.3	25.7		26.8	26.6	25.6	25.1	25.8	24.3	22.5							26.7		30.4	27.1	27.1	26.3	24.1	27.2	24.8	25.4	26										25.7		20.6	24.3	21.2	20.4
14	26.9	24.2	30.6	27.8	27.9	27.5	26.4	27.9	25.7	26.8	26.6	21.9	23.5	22.8							26.9		30.6	27.8	27.9	27.5	26.4	27.9	25.7	26.8	26.6		23.5								29		21		22.6	22.4
15		24.9		28.1	28.2		26.9		26.6	27.5	25.9	22.5	26.1	23.6							28.4		31.2	28.1	28.2	29.3	26.9	30.2	26.6	27.5	25.9		26.1								26.6		20.9	22.4	21.2	29		20.9	29
16					28	27.8		28.9		27.7	26.7	26.3	25.4	23.7							29.7		31.9	28.2	29.9	30.2	27.8	31.5	27.9	29.6	25.6		26.2								26.7		20.5	22	20.9			21.3	29.3
17					26.8	21.2		27.4	26.8	24.9	25.3	26.3	25.6	22							26		30.8	28.1	29.8	30	27.7	29.3	27.7	26.3	21.5		24.5								27.5		21.4	23.1	21.8			22.3	28.1
18					27	22.1			27.2	25.6	26.5	27.1	26.2	24							30.1		32.2	29.8	30.1	31.2	28.7	30.5	28.5												27.8		22.5	23.8	22.4			22.9	29.7
19					27.1	21.5				25.4	27.1	26.4	26.3	24							29.8		32.3	28.7	30.5	30.7	30.4	29.1	29.1												28.5		23.4	24.4	22.3			23.1
20					28.1	22.6				26.1	28.1	27.9	24.5	27.1							31.2		33.1	30.1	31.2	31.6	29.7	30.4	30.1												29.5		24.7	25.3	24.3			24.7	31.8
organ weight
	Ctr.20										HF.20
Liver	0.8208	0.7957	0.7559	0.8079	1.0419	1.092		0.8765			0.9041	1.1447	1.0194	0.8664	1.0299
BAT	0.1047	0.0809	0.1418	0.0829	0.0968	0.1143	0.0965	0.0986			0.1123	0.1726	0.158	0.0897	0.1457	0.1418
peWAT	0.2034	0.228	0.1934	0.1931	0.1578	0.102	0.1056	0.0976			0.2127	0.2378	0.1947	0.0934	0.1114	0.1035	0.102	0.1056
sWAT		0.1759	0.1932		0.1391	0.156	0.1099	0.1449				0.3305	0.2339	0.1238	0.2379	0.241
C GTT
min	HFB.20						Ctr.20					HF.20
0	3	5.2	5.1	4.1	5.7	4.1	5.2	5.8	3.9	4.1	5.1	4.6	4.1	5.3	5.6	5.2	4.2	5.6	8.5
15	11.2	12.4	10.4	10.4	12.5	12.4	11.1	10.3	8.3	7.8	9.3	10.2	16.5	13.6	12.7	13.8	15.7	12.2	12.3
30	8.6	10.8	10.7	9.9	9.1	11.4	8.9	9.8	8	7.4	9.4	11.4	12.2	9.8	10.3	13	13.4	9.4	12.1
60	6.2	5.6	8.2	7.8	6.8	6.9	6.7	7.7	5.7	5.7	7.1	7.7	9.5	9.2	8.4	10.4	9.6	5.9	7.8
90	5.9	5.1	6.8	6.3	6.9	6.3	6.8	7.3	4.8	4.7	5.2	5.4	8.7	7.8	7.7	7.5	7.8	5.8	6.1
AUC	816	861	978	934.5	939	956.25	909.75	967.5	713.25	687.75	834.75	918	1220.25	1082.25	1055.25	1194	1197	880.5	1014
D ITT
min	Ctr.20						HFB.20							HF.20
0	1	1	1	1	1	1	1	1	1	1	1	1	1	1	1	1	1	1
15	0.515152	0.673913	0.701754	0.862069	0.823529	0.421053	0.711538	0.666667	0.441558	0.586207	0.287671	0.463158	0.558442	0.692308	0.925373	0.989362	0.815385	0.895349
30	0.363636	0.521739	0.54386	0.586207	0.529412	0.192982	0.442308	0.333333	0.337662	0.528736	0.150685	0.273684	0.337662	0.551282	0.641791	0.776596	0.476923	0.72093
60	0.409091	0.76087	0.421053	0.5	0.5	0.192982	0.365385	0.192982	0.61039	0.54023	0.178082	0.189474	0.181818	0.564103	0.447761	0.787234	0.569231	0.616279
90	0.621212	0.413043	0.45614	0.586207	0.544118	0.498246	0.538462	0.280702	0.948052	0.689655	0.616438	0.484211	0.415584	0.666667	0.626866	0.659574	0.753846	0.651163
120	0.924242	0.652174	0.649123	0.637931	0.705882	0.614035	0.519231	0.631579	0.87013	0.712644	0.808219	0.505263	0.792208	0.794872	0.791045	0.712766	0.892308	0.883721
AUC	95.1562	96.9403	74.3478	66.3158	75.7759	73.6765	63.0288	48.6842	81.526	75.7759	51.1644	48.3947	53.2792	102.895	79.1346	79.9254	83.5385	76.5341
E glucose				F insulin				G HOMA-IR				H FFAs
Ctr.20	HF.20	HFB.20		Ctr.20	HF.20	HFB.20		Ctr.20	HF.20	HFB.20		Ctr.20	HF.20	HFB.20
3.81	4.44	4.95		13.397	45.7242	46.6036		2.26856	9.02291	10.2528		499.8	884.4	545.4
4.14	5.49	4.05		49.1866	64.7856	18.3244		9.05033	15.8077	3.29839		482.7	849.9	624.9
1.86	5.19	2.7		31.0206	88.5338	38.2924		2.56437	20.4218	4.59509		612.6	810	462
5.04	4.59	4.8		47.4736	26.3838	11.5048		10.6341	5.3823	2.45436		481.5	603.3	537.9
3.06	7.11	3.54		69.7502	53.3272	39.265		9.48603	16.8514	6.17769		396	526.2	374.1
[truncated: 6 more columns]

## Sheet: Figure 6
A shannon				simpson
Ctr.20	HF.20	HFB.20		Ctr.20	HF.20	HFB.20
4.332	5.606	6.182		0.751	0.907	0.965
5.34	6.56	5.612		0.847	0.973	0.916
6.439	6.035	6.037		0.962	0.931	0.957
4.628	3.946	6.134		0.813	0.663	0.964
6.772	4.886	6.07		0.978	0.813	0.962
6.471	4.668	4.537		0.976	0.781	0.843
B pcoa
	V1	V2
Ctr1.20	-0.276928	0.150057
Ctr2.20	0.192563	0.338442
Ctr3.20	0.15777	0.195377
Ctr4.20	-0.248493	0.139245
Ctr5.20	0.126195	0.161068
Ctr6.20	0.0927119	-0.139932
HF1.20	-0.185555	-0.0960083
HF2.20	0.024792	-0.150875
HF3.20	-0.144387	-0.0491607
HF4.20	-0.345593	0.0154924
HF5.20	-0.276194	0.000940325
HF6.20	-0.29602	-0.0217492
HFB1.20	0.133627	-0.193165
HFB2.20	0.164096	-0.212574
HFB3.20	0.153948	-0.185764
HFB4.20	0.181934	-0.0982449
HFB5.20	0.225059	-0.114402
HFB6.20	0.320474	0.261254
C relative abundance
Taxonomy	Akkermansia	unidentified_Ruminococcaceae	Faecalitalea	unidentified_Lachnospiraceae	Parabacteroides	Desulfovibrio	Candidatus_Saccharimonas	Allobaculum	Bacteroides	Anaerostipes	Others
Ctr.20	0.176977	0.054276	0.000296	0.043845	0.00392	0.016312	0.013929	0.004614	0.005264	0.000417	0.68015
HF.20	0.345875	0.062961	1.5e-05	0.023672	0.003008	0.031818	0.018519	0.001994	0.012527	0.000412	0.499199
HFB.20	0.048959	0.058599	0.012585	0.030823	0.01948	0.025496	0.023778	0.017927	0.011503	0.006574	0.744275
D Lachnoclostridium				E Romboutsia
Ctr.20	HF.20	HFB.20		Ctr.20	HF.20	HFB.20
0.00261993	0.00171751	0.00381346		0.000232883	0.000116442	0.000640429
0.00742315	0.00151374	0.00241616		0.000261993	0.000116442	0.000902422
0.00832557	0.00186306	0.00433745		0.000349325	0.000203773	0.000523987
0.00809269	0.00110619	0.0027946		0.000174662	0.000261993	0.000611318
0.0102177	0.00174662	0.00320214		0.000261993	0.000174662	0.000291104
0.00407545	0.00154285	0.00154285

## Sheet: Figure 7
dams after weaning					offspring at 4 weeks					offspring at 20 weeks
gut	metabolic parameters	cor	p.value		gut	metabolic parameters	cor	p.value		gut	metabolic parameters	cor	p.value
01 Blautia	HOMA-IR	0.392167	0.148243		01 Blautia	HOMA-IR	-0.329311	0.230698		01 Akkermansia	HOMA-IR	0.123374	0.661349
01 Blautia	Insulin	-0.0840419	0.76587		01 Blautia	Insulin	-0.402465	0.136946		01 Akkermansia	Insulin	-0.0552188	0.845036
01 Blautia	GLU	0.226775	0.416349		01 Blautia	GLU	-0.168054	0.54938		01 Akkermansia	GLU	0.439691	0.101009
01 Blautia	AST	0.0103081	0.970915		01 Blautia	AST	-0.29095	0.292769		01 Akkermansia	AST	0.185891	0.507131
01 Blautia	ALT	-0.0922479	0.743685		01 Blautia	ALT	-0.171067	0.542139		01 Akkermansia	ALT	0.0118455	0.96658
01 Blautia	FFA	-0.00310992	0.991224		01 Blautia	FFA	0.332492	0.225954		01 Akkermansia	FFA	0.237429	0.394178
01 Blautia	HDL-C	0.269021	0.332267		01 Blautia	HDL-C	0.0121982	0.965585		01 Akkermansia	HDL-C	0.407099	0.132058
01 Blautia	LDL-C	0.154225	0.583148		01 Blautia	LDL-C	0.332492	0.225954		01 Akkermansia	LDL-C	0.594722	0.0193649
01 Blautia	TC	-0.0488893	0.862633		01 Blautia	TC	0.295009	0.285777		01 Akkermansia	TC	0.558541	0.0304533
01 Blautia	TG	0.378379	0.164322		01 Blautia	TG	-0.293	0.289225		01 Akkermansia	TG	0.297316	0.281848
02 Desulfovibrio	HOMA-IR	0.450374	0.0920538		02 Pygmaiobacter	HOMA-IR	-0.68136	0.00515735		02 Algoriphagus	HOMA-IR	0.686643	0.00469314
02 Desulfovibrio	Insulin	0.39928	0.140376		02 Pygmaiobacter	Insulin	-0.603435	0.017232		02 Algoriphagus	Insulin	0.303205	0.271964
02 Desulfovibrio	GLU	0.55261	0.0326512		02 Pygmaiobacter	GLU	-0.509164	0.0525605		02 Algoriphagus	GLU	0.695607	0.00398183
02 Desulfovibrio	AST	-0.142191	0.613201		02 Pygmaiobacter	AST	0.304764	0.269382		02 Algoriphagus	AST	0.667241	0.00657773
02 Desulfovibrio	ALT	-0.0151596	0.957237		02 Pygmaiobacter	ALT	0.17903	0.523203		02 Algoriphagus	ALT	0.24973	0.369381
02 Desulfovibrio	FFA	-0.383502	0.158219		02 Pygmaiobacter	FFA	0.101071	0.72004		02 Algoriphagus	FFA	0.644769	0.00945589
02 Desulfovibrio	HDL-C	0.354221	0.195194		02 Pygmaiobacter	HDL-C	-0.267527	0.335062		02 Algoriphagus	HDL-C	0.0506366	0.857769
02 Desulfovibrio	LDL-C	0.495715	0.0602233		02 Pygmaiobacter	LDL-C	0.101071	0.72004		02 Algoriphagus	LDL-C	-0.131836	0.63953
02 Desulfovibrio	TC	0.333788	0.224039		02 Pygmaiobacter	TC	0.138387	0.622825		02 Algoriphagus	TC	0.631262	0.0116087
02 Desulfovibrio	TG	0.176262	0.52975		02 Pygmaiobacter	TG	-0.305774	0.267719		02 Algoriphagus	TG	0.0436966	0.877116
03 Romboutsia	HOMA-IR	0.143452	0.610025		03 Akkermansia	HOMA-IR	-0.293411	0.288519		03 Blautia	HOMA-IR	-0.123422	0.661225
03 Romboutsia	Insulin	0.254049	0.360881		03 Akkermansia	Insulin	-0.295735	0.284537		03 Blautia	Insulin	0.223734	0.422795
03 Romboutsia	GLU	0.386846	0.154317		03 Akkermansia	GLU	-0.48015	0.0700709		03 Blautia	GLU	-0.468682	0.0780336
03 Romboutsia	AST	-0.320448	0.244241		03 Akkermansia	AST	0.684769	0.00485382		03 Blautia	AST	-0.343936	0.209397
03 Romboutsia	ALT	-0.0671335	0.8121		03 Akkermansia	ALT	0.296841	0.282653		03 Blautia	ALT	-0.225755	0.418505
03 Romboutsia	FFA	-0.533037	0.0407555		03 Akkermansia	FFA	-0.125349	0.656233		03 Blautia	FFA	-0.422687	0.116492
03 Romboutsia	HDL-C	0.0415058	0.883237		03 Akkermansia	HDL-C	-0.112573	0.689566		03 Blautia	HDL-C	-0.321619	0.242425
03 Romboutsia	LDL-C	0.221605	0.427335		03 Akkermansia	LDL-C	-0.125349	0.656233		03 Blautia	LDL-C	0.059577	0.832958
03 Romboutsia	TC	0.165827	0.554761		03 Akkermansia	TC	-0.0998747	0.723232		03 Blautia	TC	-0.274408	0.322297
03 Romboutsia	TG	0.00207681	0.994139		03 Akkermansia	TG	-0.0557478	0.843568		03 Blautia	TG	-0.145244	0.605521
04 Intestinimonas	HOMA-IR	0.528445	0.042856		04 Romboutsia	HOMA-IR	-0.143171	0.610731		04 Hyphomonas	HOMA-IR	0.611377	0.0154498
04 Intestinimonas	Insulin	0.400697	0.138842		04 Romboutsia	Insulin	-0.508508	0.0529164		04 Hyphomonas	Insulin	0.313761	0.254777
04 Intestinimonas	GLU	0.44188	0.0991263		04 Romboutsia	GLU	-0.145585	0.604664		04 Hyphomonas	GLU	0.661569	0.00722835
04 Intestinimonas	AST	0.658086	0.00765223		04 Romboutsia	AST	0.126738	0.652642		04 Hyphomonas	AST	0.707007	0.00320395
04 Intestinimonas	ALT	0.741936	0.00154122		04 Romboutsia	ALT	-0.0658372	0.815671		04 Hyphomonas	ALT	0.0623904	0.82518
04 Intestinimonas	FFA	0.345644	0.206994		04 Romboutsia	FFA	0.0343501	0.903271		04 Hyphomonas	FFA	0.499901	0.0577563
04 Intestinimonas	HDL-C	0.5628	0.0289451		04 Romboutsia	HDL-C	-0.297811	0.281009		04 Hyphomonas	HDL-C	0.199214	0.476589
04 Intestinimonas	LDL-C	0.445047	0.0964463		04 Romboutsia	LDL-C	0.0343501	0.903271		04 Hyphomonas	LDL-C	-0.0271741	0.923416
04 Intestinimonas	TC	0.645509	0.00934769		04 Romboutsia	TC	-0.181882	0.516493		04 Hyphomonas	TC	0.521547	0.0461609
04 Intestinimonas	TG	0.33529	0.221832		04 Romboutsia	TG	0.135017	0.631398		04 Hyphomonas	TG	0.0450326	0.873386
05 Acetatifactor	HOMA-IR	0.706107	0.00326054		05 Candidatus_Arthromitus	HOMA-IR	0.228965	0.41174		05 Lachnoclostridium	HOMA-IR	-0.169225	0.546561
05 Acetatifactor	Insulin	0.374932	0.168516		05 Candidatus_Arthromitus	Insulin	0.296145	0.283839		05 Lachnoclostridium	Insulin	0.13906	0.621118
05 Acetatifactor	GLU	0.591482	0.0202074		05 Candidatus_Arthromitus	GLU	0.142652	0.61204		05 Lachnoclostridium	GLU	-0.53133	0.0415274
05 Acetatifactor	AST	0.333692	0.22418		05 Candidatus_Arthromitus	AST	-0.571526	0.0260319		05 Lachnoclostridium	AST	-0.146061	0.603471
05 Acetatifactor	ALT	0.607807	0.0162324		05 Candidatus_Arthromitus	ALT	-0.50725	0.053605		05 Lachnoclostridium	ALT	-0.261193	0.347063
05 Acetatifactor	FFA	0.074496	0.79189		05 Candidatus_Arthromitus	FFA	0.01501	0.957658		05 Lachnoclostridium	FFA	-0.507766	0.053322
05 Acetatifactor	HDL-C	0.508463	0.052941		05 Candidatus_Arthromitus	HDL-C	0.18577	0.507412		05 Lachnoclostridium	HDL-C	-0.283011	0.306734
05 Acetatifactor	LDL-C	0.367361	0.177972		05 Candidatus_Arthromitus	LDL-C	0.01501	0.957658		05 Lachnoclostridium	LDL-C	0.0359384	0.898819
05 Acetatifactor	TC	0.524098	0.0449174		05 Candidatus_Arthromitus	TC	-0.14184	0.614087		05 Lachnoclostridium	TC	-0.458294	0.0857865
05 Acetatifactor	TG	0.452015	0.0907294		05 Candidatus_Arthromitus	TG	0.0637068	0.821545		05 Lachnoclostridium	TG	-0.157218	0.575768
06 Akkermansia	HOMA-IR	-0.705534	0.00329701		06 Marvinbryantia	HOMA-IR	0.385638	0.155719		06 Romboutsia	HOMA-IR	-0.41234	0.126675
06 Akkermansia	Insulin	-0.601825	0.0176117		06 Marvinbryantia	Insulin	0.554298	0.0320138		06 Romboutsia	Insulin	-0.242193	0.38447
06 Akkermansia	GLU	-0.701071	0.00359222		06 Marvinbryantia	GLU	0.278907	0.314103		06 Romboutsia	GLU	-0.419523	0.119544
06 Akkermansia	AST	-0.23029	0.408964		06 Marvinbryantia	AST	-0.243788	0.381251		06 Romboutsia	AST	-0.275049	0.321122
06 Akkermansia	ALT	-0.458063	0.0859647		06 Marvinbryantia	ALT	-0.13228	0.638392		06 Romboutsia	ALT	-0.245131	0.378549
06 Akkermansia	FFA	0.0706458	0.802444		06 Marvinbryantia	FFA	-0.273491	0.323982		06 Romboutsia	FFA	-0.517312	0.0482811
06 Akkermansia	HDL-C	-0.700806	0.00361037		06 Marvinbryantia	HDL-C	-0.158293	0.573127		06 Romboutsia	HDL-C	-0.188279	0.50159
06 Akkermansia	LDL-C	-0.739666	0.00162171		06 Marvinbryantia	LDL-C	-0.273491	0.323982		06 Romboutsia	LDL-C	-0.325255	0.236837
06 Akkermansia	TC	-0.725659	0.00219643		06 Marvinbryantia	TC	-0.298182	0.28038		06 Romboutsia	TC	-0.478572	0.0711306
06 Akkermansia	TG	-0.478018	0.071505		06 Marvinbryantia	TG	0.12984	0.644654		06 Romboutsia	TG	-0.353564	0.196082
07 Dubosiella	HOMA-IR	-0.697335	0.00385517		07 Papillibacter	HOMA-IR	-0.708814	0.00309265		07 Turicibacter	HOMA-IR	-0.316312	0.250726
07 Dubosiella	Insulin	-0.532587	0.040958		07 Papillibacter	Insulin	-0.721102	0.00241508		07 Turicibacter	Insulin	-0.19147	0.494232
07 Dubosiella	GLU	-0.788923	0.000472133		07 Papillibacter	GLU	-0.543305	0.0363371		07 Turicibacter	GLU	-0.518586	0.0476359
07 Dubosiella	AST	-0.497458	0.0591869		07 Papillibacter	AST	0.277482	0.316685		07 Turicibacter	AST	0.11937	0.671763
07 Dubosiella	ALT	-0.561862	0.0292722		07 Papillibacter	ALT	0.0526058	0.852293		07 Turicibacter	ALT	0.0677933	0.810285
07 Dubosiella	FFA	-0.0769007	0.785315		07 Papillibacter	FFA	0.265651	0.338592		07 Turicibacter	FFA	-0.161144	0.566147
07 Dubosiella	HDL-C	-0.757834	0.00106321		07 Papillibacter	HDL-C	-0.397432	0.142391		07 Turicibacter	HDL-C	-0.00916503	0.97414
07 Dubosiella	LDL-C	-0.740711	0.00158424		07 Papillibacter	LDL-C	0.265651	0.338592		07 Turicibacter	LDL-C	-0.253182	0.362578
07 Dubosiella	TC	-0.795274	0.000393538		07 Papillibacter	TC	0.127259	0.651299		07 Turicibacter	TC	-0.188936	0.500072
07 Dubosiella	TG	-0.251092	0.36669		07 Papillibacter	TG	-0.42935	0.110242		07 Turicibacter	TG	-0.15543	0.580171
					08 Desulfovibrio	HOMA-IR	0.342457	0.211491
					08 Desulfovibrio	Insulin	0.340237	0.214662
					08 Desulfovibrio	GLU	0.385081	0.156369
					08 Desulfovibrio	AST	0.186092	0.506661
					08 Desulfovibrio	ALT	0.271771	0.327156
					08 Desulfovibrio	FFA	0.300905	0.275798
					08 Desulfovibrio	HDL-C	-0.208232	0.456431
					08 Desulfovibrio	LDL-C	0.300905	0.275798
					08 Desulfovibrio	TC	-0.126138	0.654192
					08 Desulfovibrio	TG	-0.120469	0.668897
